# Supplementary material
Source: PubMed Central journal article supplement (PMC2596295)

# Midline-Posterior SSVEP

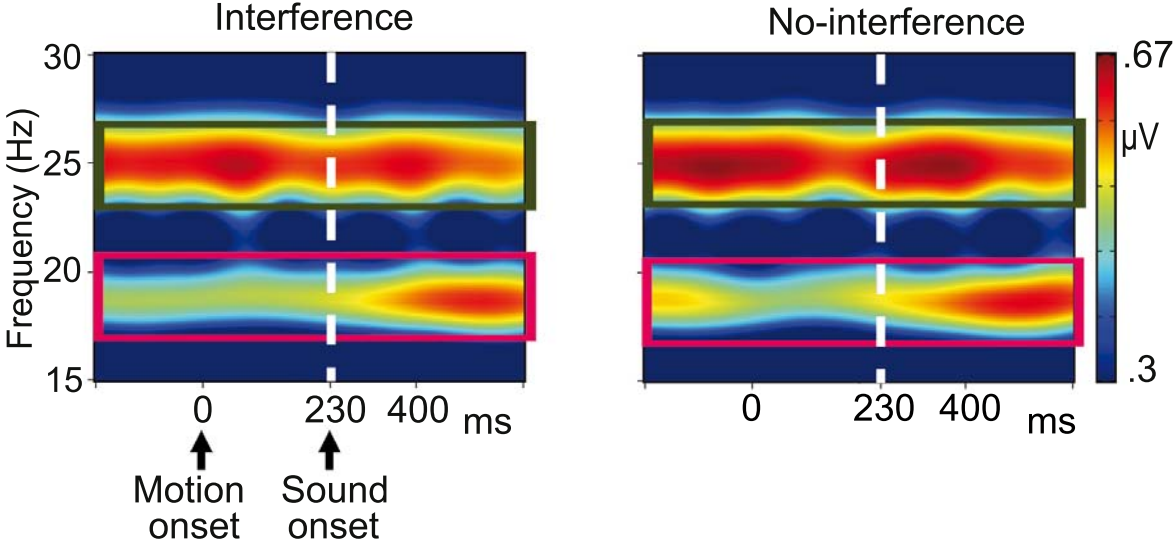

Supplement: NIHMS74011-supplement-01.pdf [file NIHMS74011-supplement-01.pdf]
